# Supplementary material for: An ant colony optimisation algorithm for the 2D and 3D hydrophobic polar protein folding problem
Source: PubMed Central journal article supplement (PMC555464; doi:10.1186/1471-2105-6-30), 2005-02-14
Supplement: 1471-2105-6-30-S1.pdf [file 1471-2105-6-30-S1.pdf]

# Supplementary Material

## **Additional File 1**

The following tables provide additional information on our new test sets of biological and randomly generated HP sequences and the results from our computational experiment with ACO-HPPFP-3 and PERM. For the biological sequences, we show the PDB IDs of the original protein sequences. Note that in our translation from protein sequences into HP strings, non-standard amino acid symbols, such as X and Z, were skipped; consequently, some of our HP strings differ in length from the respective PDBSELECT sequences.

| ID     | PDB ID | HP sequence                 | Length |
|--------|--------|-----------------------------|--------|
| B30-1  | 1HA9:A | phpphhphphpppppppphhphpphph | 34     |
| B30-2  | 1CE4:A | pphpppppphphhhphphhhphpph   | 35     |
| B30-3  | 1FWO:A | pphpppphphhhpppphhphhhphpph | 35     |
| B30-4  | 1ZTA   | hphpphpppphphpphpphphpph    | 35     |
| B30-5  | 1G1Z:A | pphphhhpphhhhpphphhhphph    | 31     |
| B30-6  | 1BZG   | hhppphhpphpphpphphhhphpph   | 34     |
| B30-7  | 1BH7   | hphpphhhhphhphphhhhhpphph   | 33     |
| B30-8  | 1B4G   | hhpphphphpphpphpphpph       | 29     |
| B30-9  | 1BNX:A | phhhhhpphphhhhhhhphhhhhhh   | 33     |
| B30-10 | 1FCT   | hhhhpphphhhhhhhphhhhhhh     | 32     |

Table A-1: Biological sequences of length  $\approx 30$

| ID     | $E_{min}$ (2D) | PERM  |       |           | ACO       |
|--------|----------------|-------|-------|-----------|-----------|
|        |                | $t_1$ | $t_2$ | $t_{exp}$ | $t_{avg}$ |
| B30-1  | -12            | 0.43  | 0.56  | 0.49      | 0.71      |
| B30-2  | -12            | 0.15  | 4.09  | 0.29      | 1.08      |
| B30-3  | -14            | 0.15  | 0.02  | 0.04      | 1.19      |
| B30-4  | -10            | 2.5   | 0.3   | 0.54      | 3.64      |
| B30-5  | -13            | 0.10  | 0.17  | 0.12      | 0.22      |
| B30-6  | -13            | 0.84  | 10.40 | 1.55      | 70.94     |
| B30-7  | -16            | 0.02  | 0.02  | 0.02      | 0.19      |
| B30-8  | -8             | 0.09  | 0.003 | 0.006     | 0.17      |
| B30-9  | -18            | 0.002 | 0.008 | 0.003     | 0.06      |
| B30-10 | -16            | 0.003 | 12.50 | 0.006     | 4.08      |

Table A-2: Performance comparison of PERM and ACO-HPPFP-3 on biological sequences of length  $\approx 30$  in 2D

| ID     | $E_{min}$ (3D) | PERM  |       |           | ACO       |
|--------|----------------|-------|-------|-----------|-----------|
|        |                | $t_1$ | $t_2$ | $t_{exp}$ | $t_{avg}$ |
| B30-1  | -17            | 1.14  | 1.03  | 1.08      | 1.19      |
| B30-2  | -16            | 1.06  | 1.3   | 1.17      | 2.29      |
| B30-3  | -18            | 1.20  | 1.20  | 1.20      | 2.34      |
| B30-4  | -16            | 3.4   | 1.2   | 1.77      | 20.18     |
| B30-5  | -20            | 2.2   | 3.04  | 2.55      | 65.71     |
| B30-6  | -19            | 1.20  | 1.50  | 1.33      | 23.18     |
| B30-7  | -25            | 1.10  | 2.40  | 1.51      | 62.36     |
| B30-8  | -13            | 1.10  | 1.07  | 1.09      | 1.74      |
| B30-9  | -26            | 1.20  | 1.09  | 1.14      | 1.57      |
| B30-10 | -24            | 1.8   | 3 291 | 3.60      | 163.23    |

Table A-3: Performance comparison of PERM and ACO-HPPFP-3 on biological sequences of length  $\approx 30$  in 3D

| ID     | PDB ID | HP sequence                                  | Length |
|--------|--------|----------------------------------------------|--------|
| B50-1  | 1KBF:A | hphpppppppphhpphpppppphhhhpppppppppppppphhpp | 49     |
| B50-2  | 1KBH:A | phpppphhhhpphpphhpppphphpphphhhhhphhpphphhp  | 47     |
| B50-3  | 1G9P:A | hhhhhhhhpppppppppphphpppphphhhhhhhhhhhhh     | 45     |
| B50-4  | 1YUJ:A | hphpphphhhpppppppppphphhphhhhhpppppphphpph   | 50     |
| B50-5  | 1GAB   | phpphhpppphhhhpphphpphhpphhphpppphphpphph    | 53     |
| B50-6  | 2BRZ   | pppphhpphhpppphhpppphpppphphpphphpppphphpph  | 53     |
| B50-7  | 1VPC   | pphphphhhhhpphphhhhhphhpppphhhhpppppphhppp   | 45     |
| B50-8  | 1VIB   | hphhhhhhhpppppppphphpphphhhhhpphphppppppppp  | 54     |
| B50-9  | 1CEU:A | hphhpppphpppphphphpphphpppphphhphhhpphphpph  | 51     |
| B50-10 | 1CFH   | hphhphpphhphpppppppppphphpphphpppppppphphpph | 47     |

Table A-4: Biological sequences of length  $\approx 50$

| ID     | $E_{min}$ (2D) | $t_1$  | PERM   |           | ACO       |
|--------|----------------|--------|--------|-----------|-----------|
|        |                |        | $t_2$  | $t_{exp}$ | $t_{avg}$ |
| B50-1  | -12            | 5.60   | 3.90   | 4.60      | 39.5      |
| B50-2  | -19            | 650.40 | 0.90   | 1.80      | 283.31    |
| B50-3  | -20            | 3.80   | 0.04   | 0.08      | 2.47      |
| B50-4  | -17            | 3.33   | 2.24   | 2.68      | 184.5     |
| B50-5  | -22            | 4.90   | 117.80 | 9.41      | 820.37    |
| B50-6  | -14            | 0.43   | 0.74   | 0.55      | 2.08      |
| B50-7  | -17            | 270.70 | 298.80 | 284.06    | 130.35    |
| B50-8  | -14            | 0.04   | 2.16   | 0.07      | 0.29      |
| B50-9  | -21            | 0.40   | 0.23   | 0.29      | 55.32     |
| B50-10 | -14            | 0.27   | 0.3    | 0.28      | 3.22      |

Table A-5: Performance comparison of PERM and ACO-HPPFP-3 on biological sequences of length  $\approx 50$  in 2D

| ID     | $E_{min}$ (3D) | $t_1$  | PERM   |           | ACO       |
|--------|----------------|--------|--------|-----------|-----------|
|        |                |        | $t_2$  | $t_{exp}$ | $t_{avg}$ |
| B50-1  | -18            | 2.08   | 1.50   | 1.74      | 14.65     |
| B50-2  | -29            | 43.60  | 18.20  | 25.68     | 701.84    |
| B50-3  | -28            | 1.40   | 1.30   | 1.35      | 5.52      |
| B50-4  | -28            | 2.29   | 1822.2 | 117.90    | (-27)     |
| B50-5  | -37            | 18.2   | 1235.9 | 164.87    | (-36)     |
| B50-6  | -25            | 2.80   | 10.7   | 4.44      | 1638.29   |
| B50-7  | -26            | 406.90 | 2.70   | 5.36      | 814.11    |
| B50-8  | -25            | 10.05  | (-24)  | -         | 1026.12   |
| B50-9  | -36            | 3492.6 | 4.03   | 16.10     | (-35)     |
| B50-10 | -22            | 2.50   | 1.40   | 1.80      | 200.68    |

Table A-6: Performance comparison of PERM and ACO-HPPFP-3 on biological sequences of length  $\approx 50$  in 3D

| ID     | HP sequence                    | Length | $H$ fraction |
|--------|--------------------------------|--------|--------------|
| R30-1  | pphphpphpphppppphhphpphhpph    | 30     | 0.40         |
| R30-2  | hppppphhphhhpphpphhhhhhhhpph   | 30     | 0.53         |
| R30-3  | pphpphpppphhpppphphpphphhhhh   | 30     | 0.47         |
| R30-4  | pphhhhpppphphpphphpppppphphh   | 30     | 0.40         |
| R30-5  | hhppphhphpphhphhhpphphpphphpph | 30     | 0.50         |
| R30-6  | phhpphphppppphhhphpppppphhhh   | 30     | 0.43         |
| R30-7  | phhhphhhpppphphpphphhhpppppph  | 30     | 0.47         |
| R30-8  | pphpphhphphhhpphphhhphhhphph   | 30     | 0.50         |
| R30-9  | hhphpppphpppphphpphphpphphph   | 30     | 0.43         |
| R30-10 | hphphpphphhphpphphhhhhphhphhp  | 30     | 0.53         |

Table A-7: Random sequences of length 30

| ID     | $E_{min}$ (2D) | PERM  |       |           | ACO       |
|--------|----------------|-------|-------|-----------|-----------|
|        |                | $t_1$ | $t_2$ | $t_{exp}$ | $t_{avg}$ |
| R30-1  | -90            | 0.4   | 0.001 | 0.002     | 0.27      |
| R30-2  | -13            | 1.60  | 0.011 | 0.022     | 0.58      |
| R30-3  | -10            | 0.14  | 0.001 | 0.002     | 0.17      |
| R30-4  | -9             | 0.04  | 0.07  | 0.05      | 0.26      |
| R30-5  | -13            | 0.01  | 0.038 | 0.02      | 0.44      |
| R30-6  | -11            | 86.3  | 0.33  | 0.65      | 12.85     |
| R30-7  | -8             | 0.007 | 0.03  | 0.01      | 0.10      |
| R30-8  | -12            | 0.033 | 0.017 | 0.045     | 0.38      |
| R30-9  | -9             | 0.002 | 0.11  | 0.004     | 0.14      |
| R30-10 | -12            | 0.007 | 0.001 | 0.002     | 0.34      |

Table A-8: Performance comparison of PERM and ACO-HPPFP-3 on random sequences of length 30 in 2D

| ID     | $E_{min}$ (3D) | PERM  |       |           | ACO       |
|--------|----------------|-------|-------|-----------|-----------|
|        |                | $t_1$ | $t_2$ | $t_{exp}$ | $t_{avg}$ |
| R30-1  | -13            | 0.16  | 0.16  | 0.16      | 0.47      |
| R30-2  | -18            | 0.22  | 0.44  | 0.29      | 3.44      |
| R30-3  | -15            | 1.00  | 1.85  | 1.30      | 17.81     |
| R30-4  | -12            | 0.14  | 0.26  | 0.18      | 0.25      |
| R30-5  | -19            | 0.53  | 0.51  | 0.52      | 28.77     |
| R30-6  | -14            | 0.22  | 0.10  | 0.14      | 1.11      |
| R30-7  | -11            | 0.118 | 0.067 | 0.09      | 0.055     |
| R30-8  | -17            | 0.19  | 0.28  | 0.225     | 0.57      |
| R30-9  | -14            | 0.22  | 0.24  | 0.23      | 1.48      |
| R30-10 | -19            | 2.22  | 0.27  | 0.48      | 16.69     |

Table A-9: Performance comparison of PERM and ACO-HPPFP-3 on random sequences of length 30 in 3D

| ID     | HP sequence                                         | Length | $H$ fraction |
|--------|-----------------------------------------------------|--------|--------------|
| R50-1  | ppphrphrpppprphhhphhhpppprphrphppprphhhhhphpphh     | 50     | 0.48         |
| R50-2  | hhhhhhphpppppppphhpphhhhhhphpphhhhpppppppphhppph    | 50     | 0.52         |
| R50-3  | hhhrphrphrpppprphhhphhhhhhhhhphppprphhhphppprhpppp  | 50     | 0.54         |
| R50-4  | hhhhpprphrphrpphhpppppprphpppphhhhphhhpppprppphhh   | 50     | 0.48         |
| R50-5  | ppphpppprphrphrpphhphrphhhhhhhhhpphhpppppppppprph   | 50     | 0.46         |
| R50-6  | pphrrphrphhhpppppppprphpppppprphhhhhphrphhhhhpphhph | 50     | 0.48         |
| R50-7  | phhpppprphrpphhpppphhhhphrphhhphrphrpphhhhphrhhhhp  | 50     | 0.56         |
| R50-8  | hpppprphrpprphrpphhhhhhpphhhhhhpppphhpprphrpppphhp  | 50     | 0.50         |
| R50-9  | pphphrphrphrpppppprphrphrphrpppppppprphhhhhhhpphh   | 50     | 0.46         |
| R50-10 | hhphrpppprphrpppppprphrpppppppphhhhhhhhhhphrph      | 50     | 0.44         |

Table A-10: Random sequences of length 50

| ID     | $E_{min}$ (2D) | PERM      |       |           | ACO       |
|--------|----------------|-----------|-------|-----------|-----------|
|        |                | $t_1$     | $t_2$ | $t_{exp}$ | $t_{avg}$ |
| R50-1  | -29            | 575.90    | 1.05  | 2.09      | 367.70    |
| R50-2  | -34            | 1.40      | 2.40  | 1.77      | 1 150.10  |
| R50-3  | -32            | 1.00      | 5.50  | 1.69      | 893.66    |
| R50-4  | -32            | 2.70      | 2.40  | 2.54      | 1 329.01  |
| R50-5  | -32            | (-31)     | 5.49  | -         | (-31)     |
| R50-6  | -32            | 3.8       | 1.6   | 2.25      | 1 153.81  |
| R50-7  | -38            | 15 322.20 | 46.20 | 92.12     | (-37)     |
| R50-8  | -33            | 1.30      | 0.91  | 1.07      | 837.13    |
| R50-9  | -30            | 9892.00   | 1.70  | 3.40      | 1000.49   |
| R50-10 | -27            | 72.80     | 1.80  | 3.51      | 530.84    |

Table A-11: Performance comparison of PERM and ACO-HPPFP-3 on random sequences of length 50 in 2D

| ID     | $E_{min}$ (3D) | PERM      |       |           | ACO       |
|--------|----------------|-----------|-------|-----------|-----------|
|        |                | $t_1$     | $t_2$ | $t_{exp}$ | $t_{avg}$ |
| R50-1  | -29            | 575.90    | 1.05  | 2.09      | 367.70    |
| R50-2  | -34            | 1.40      | 2.40  | 1.77      | 1 150.10  |
| R50-3  | -32            | 1.00      | 5.50  | 1.69      | 893.66    |
| R50-4  | -32            | 2.70      | 2.40  | 2.54      | 1 329.01  |
| R50-5  | -32            | (-31)     | 5.49  | -         | (-31)     |
| R50-6  | -32            | 3.8       | 1.6   | 2.25      | 1 153.81  |
| R50-7  | -38            | 15 322.20 | 46.20 | 92.12     | (-37)     |
| R50-8  | -33            | 1.30      | 0.91  | 1.07      | 837.13    |
| R50-9  | -30            | 9892.00   | 1.70  | 3.40      | 1000.49   |
| R50-10 | -27            | 72.80     | 1.80  | 3.51      | 530.84    |

Table A-12: Performance comparison of PERM and ACO-HPPFP-3 on random sequences of length 50 in 3D
